# Supplementary material
Source: PubMed Central journal article supplement (PMC3076840)
Supplement: 1103090108_pnas.1103090108_SI.pdf [file 1103090108_pnas.1103090108_SI.pdf]

# Supporting Information

Li and Aldrich 10.1073/pnas.1103090108

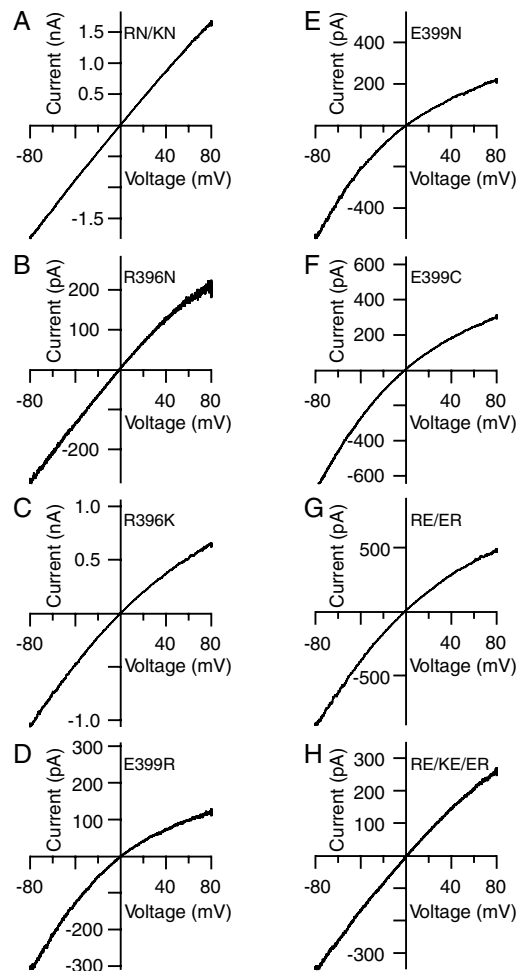

**Fig. S1.** Mutational effects of R396, K397, and E399 on the inward rectification of small conductance  $\text{Ca}^{2+}$  activated  $\text{K}^+$  (SK) channels. Representative currents are shown for R396N/K397N (A), R396N (B), R396K (C), E399R (D), E399N (E), E399C (F), R396E/E399R (G), and R396E/K397E/E399R channels (H). Recording conditions are the same as in Fig. 1C.
